# Supplementary material for: Autofluorescence of hydrogels without a fluorophore
Source: Royal Society of Chemistry journal article supplement (doi:10.1039/c9sm00034h), 2019-01-01
Supplement: c9sm00034h1.pdf [file c9sm00034h1.pdf]

## Supporting Information

### Autofluorescence of Hydrogels without Fluorophore

Hua-Xiu Xu, Yun Tan, Di Wang, Xiong-Lei Wang, Wen-Li An, Ping-Ping Xu, Shimei Xu\* and Yu-Zhong Wang\*

*Collaborative Innovation Center for Eco-Friendly and Fire-Safety Polymeric Materials(MoE), State Key Laboratory of Polymer Materials Engineering, National Engineering Laboratory of Eco-Friendly Polymeric Materials (Sichuan), College of Chemistry, Sichuan University, Chengdu 610064, China*

Email: xushimei@scu.edu.cn; yzwang@scu.edu.cn

#### Results and Discussion

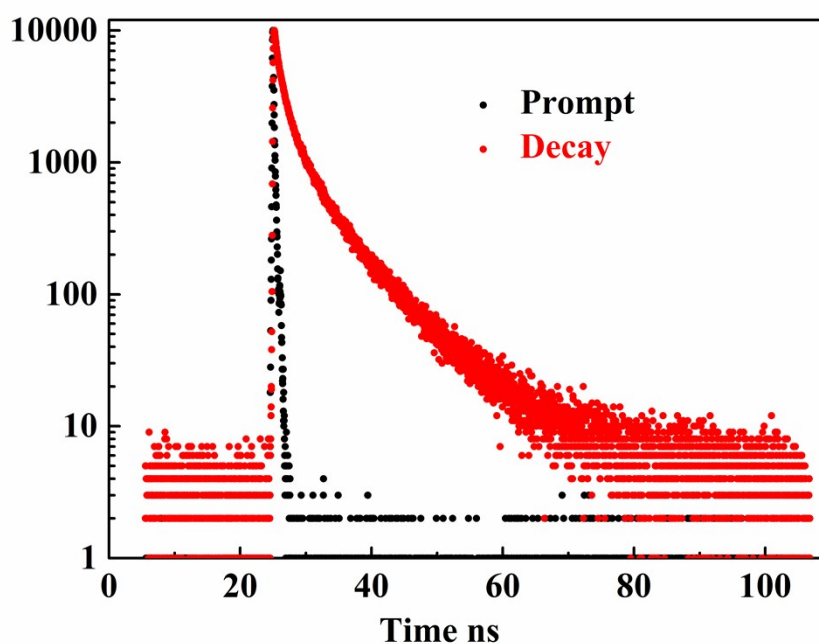

**Figure S1** Time-resolved fluorescence of PAM gel

(prompt is for Lamp spectrum as background and decay is for PAM gel)

By curve fitting, we can get the following results:

$$\tau_1 = 1.6263 \text{ ns (35\%); } \tau_2 = 7.1813 \text{ ns (8\%); } \tau_3 = 0.2360 \text{ ns (57\%)}$$

So we can get average life time  $\tau = 1.28$  ns

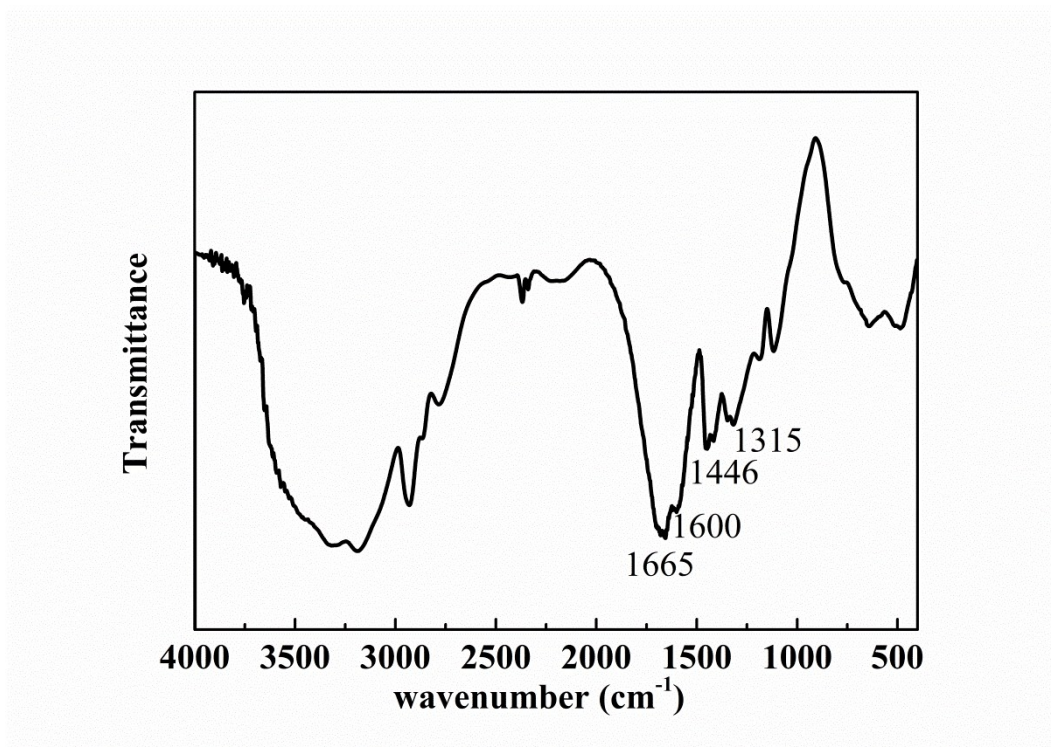

**Figure S2** FITR spectra of chemically cross-linked PAM gel

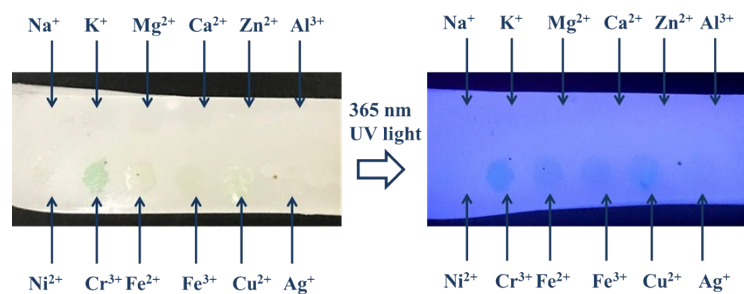

**Figure S3** Effect of some metal ions on the fluorescence of PAM gel

It can be seen that  $\text{Fe}^{2+}$ ,  $\text{Fe}^{3+}$ ,  $\text{Cu}^{2+}$  and  $\text{Cr}^{3+}$  quench the fluorescence of the PAM gel. We used UV-Vis spectrophotometer to detect the absorption of light by  $\text{Fe}^{3+}$ ,  $\text{Ag}^+$  and  $\text{Ni}^{2+}$  ions. The experimental results show that  $\text{Fe}^{3+}$ ,  $\text{Ag}^+$  and  $\text{Ni}^{2+}$  ions absorb UV light (Figure S4), whereas  $\text{Fe}^{3+}$  can quench fluorescence, while  $\text{Ag}^+$  and  $\text{Ni}^{2+}$  cannot. So the absorption of ultraviolet light by  $\text{Fe}^{3+}$  is not the main reason for its quenching fluorescence. And a large amount of literature also tends to support the viewpoint that the interaction between  $\text{Fe}^{3+}$  and matrix is the main cause of fluorescence quenching<sup>1-4</sup>. The interaction of  $\text{Fe}^{3+}$  with  $-\text{C}=\text{O}$  in the PAM gel is confirmed in Figure S5. Besides, the filter effect is also one of probable reasons for the decreased fluorescence intensity.

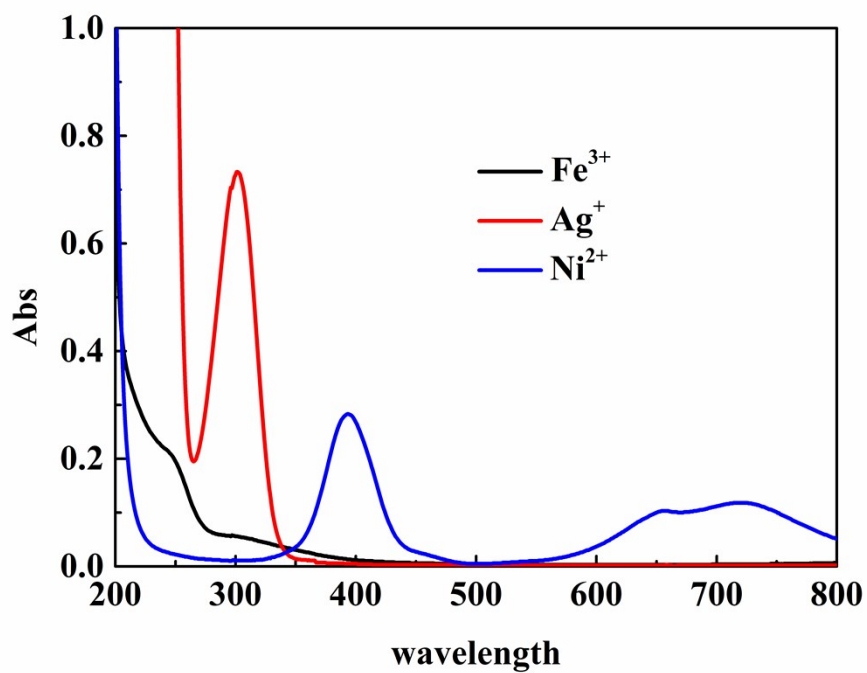

Figure R4 UV-Vis absorption spectrum of Fe<sup>3+</sup>, Ag<sup>+</sup> and Ni<sup>2+</sup> ions

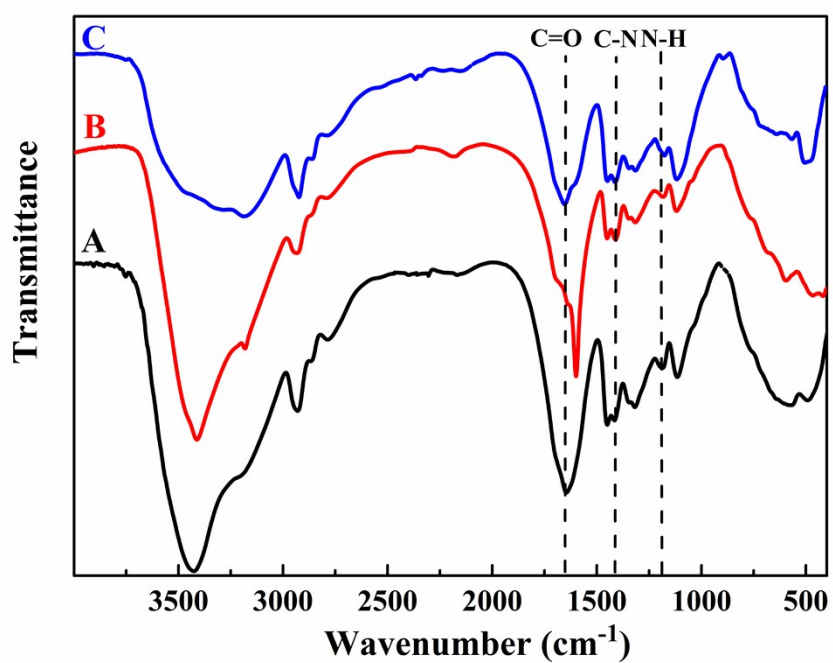

Figure S5 FTIR spectra of PAM gel without Fe<sup>3+</sup> (A); PAM gel with Fe<sup>3+</sup> (B); PAM gel with Fe<sup>3+</sup> after scrubbing (C).

1. Z. Gu, W. Lei, W. Shi, Q. Hao, W. Si, X. Xia and F. Wang, *Spectrochim. Acta A*, 2014, **132**, 361-368.
2. J. H. Ye, J. Liu, Z. H. Wang, Y. Bai, W. C. Zhang and W. J. He, *Tetrahedron Lett.*, 2014, **55**, 3688-3692.
3. L. L. Zhao, X. Xin, P. Ding, A. X. Song, Z. C. Xie, J. L. Shen and G. Y. Xu, *Anal. Chim. Acta*, 2016, **926**, 99-106.
4. S. Maity, N. Parshi, C. Proadhan, K. Chaudhuri and J. Ganguly, *Carbohydr. Polym.*, 2018, **193**, 119-128.
